# Supplementary material
Source: Springer Nature journal article supplement (https://www.springermedizin.de/resource/supplementary/12885_2011_2761_MOESM2_ESM.pdf/9461936)

VEGF

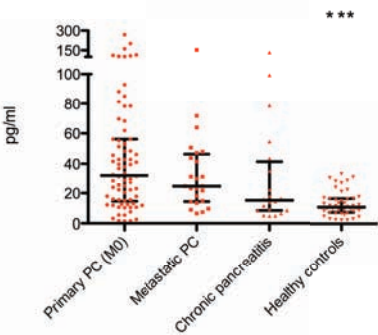

sVEGFR-1

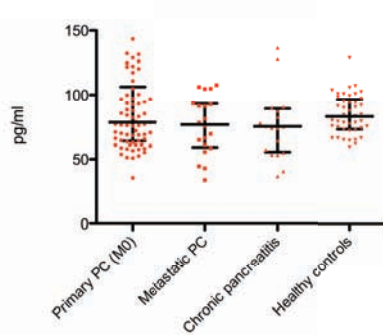

PlGF

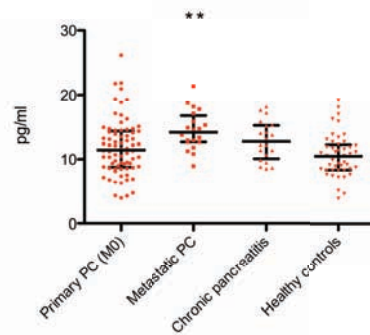

PDGF-AA

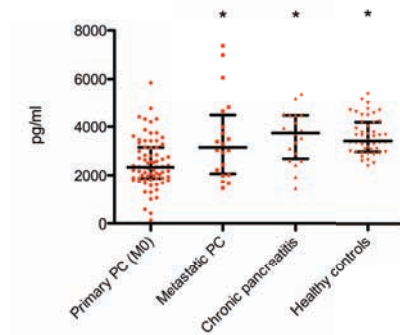

PDGF-BB

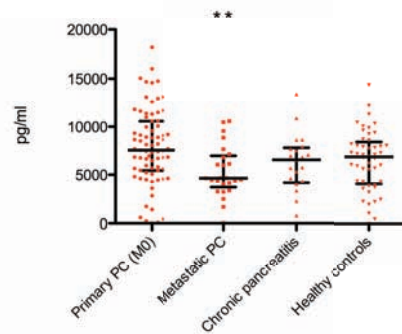

EGF

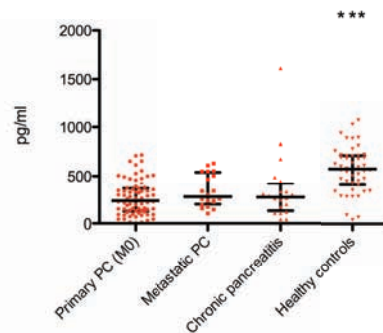

Ang-1

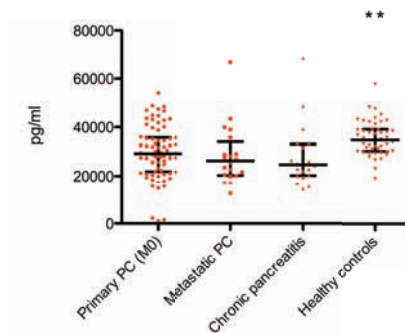

Supplement: MOESM2 [file 9461936]
